# Supplementary material for: Reassessing the substrate specificities of the major Staphylococcus aureus peptidoglycan hydrolases lysostaphin and LytM
Source: eLife. 2024 Nov 4;13:RP93673. doi: 10.7554/eLife.93673 (PMC11534333; doi:10.7554/eLife.93673)
Supplement: Figure 3—source data 1. [file elife-93673-fig3-data1.xlsx]

## Sheet: LSS+peptide 2
				INTEGRALS				CONCENTRATIONS
		Time (min)		KAG Ala Ha 1/2 quartet	substrate Ala Ha 1/8 quartet	KAGG Ala Ha 1/8 quartet	DSS	KAG	substrate	KAGG
LSS added	2022-06-01 18:38:50	0
10801	2022-06-01 18:53:37	14.7894		0.311	1.6949		1	0.5598	12.2033
10802	2022-06-01 19:01:40	22.8392		0.479	1.6154		1	0.8622	11.6309
10803	2022-06-01 19:09:44	30.9048		0.659	1.5688	0.0808	1	1.1862	11.2954	0.58176
10804	2022-06-01 19:17:48	38.968		0.8308	1.5294	0.1001	1	1.49544	11.0117	0.72072
10805	2022-06-01 19:25:51	47.0308		0.9538	1.4516	0.0864	1	1.71684	10.4515	0.62208
10806	2022-06-01 19:33:55	55.0987		1.1648	1.4419	0.1071	1	2.09664	10.3817	0.77112
10807	2022-06-01 19:41:59	63.1626		1.3277	1.3843	0.1226	1	2.38986	9.96696	0.88272
10808	2022-06-01 19:50:03	71.2235		1.4795	1.357	0.1283	1	2.6631	9.7704	0.92376
10809	2022-06-01 19:58:07	79.2888		1.6354	1.3108	0.1403	1	2.94372	9.43776	1.01016
10810	2022-06-01 20:06:11	87.354		1.7742	1.2718	0.1611	1	3.19356	9.15696	1.15992
10811	2022-06-01 20:14:15	95.4195		1.9205	1.2455	0.1671	1	3.4569	8.9676	1.20312
10812	2022-06-01 20:22:19	103.487		2.0536	1.2128	0.1723	1	3.69648	8.73216	1.24056
10813	2022-06-01 20:30:23	111.551
10814	2022-06-01 20:38:26	119.616
10815	2022-06-01 20:46:30	127.679		2.4141	1.1112	0.1855	1	4.34538	8.00064	1.3356
10816	2022-06-01 20:54:34	135.745
10817	2022-06-01 21:02:38	143.81
10818	2022-06-01 21:10:42	151.873		2.7543	1.0306	0.2078	1	4.95774	7.42032	1.49616
10819	2022-06-01 21:18:46	159.936
10820	2022-06-01 21:26:49	167.999
10821	2022-06-01 21:34:53	176.062		3.0465	0.9501	0.2204	1	5.4837	6.84072	1.58688
10822	2022-06-01 21:42:57	184.126
10823	2022-06-01 21:51:01	192.195
10824	2022-06-01 21:59:05	200.258		3.3292	0.8908	0.2431	1	5.99256	6.41376	1.75032
10825	2022-06-01 22:07:09	208.322
10826	2022-06-01 22:15:13	216.387
10827	2022-06-01 22:23:16	224.449
10828	2022-06-01 22:31:20	232.513		3.622	0.8023	0.2626	1	6.5196	5.77656	1.89072
10829	2022-06-01 22:39:24	240.574
10830	2022-06-01 22:47:28	248.638
10831	2022-06-01 22:55:32	256.704
10832	2022-06-01 23:03:35	264.766		3.8953	0.7232	0.2734	1	7.01154	5.20704	1.96848
10833	2022-06-01 23:11:39	272.827
10834	2022-06-01 23:19:43	280.892
10835	2022-06-01 23:27:47	288.956
10836	2022-06-01 23:35:51	297.017
10837	2022-06-01 23:43:54	305.08		4.1894	0.6504	0.2902	1	7.54092	4.68288	2.08944
10838	2022-06-01 23:51:58	313.142
10839	2022-06-02 00:00:02	321.203
10840	2022-06-02 00:08:06	329.268
10841	2022-06-02 00:16:09	337.332		4.3957	0.5973	0.3194	1	7.91226	4.30056	2.29968
10842	2022-06-02 00:24:13	345.397
10843	2022-06-02 00:32:17	353.463
10844	2022-06-02 00:40:21	361.527
10845	2022-06-02 00:48:25	369.592
10846	2022-06-02 00:56:29	377.653		4.5821	0.5324	0.312	1	8.24778	3.83328	2.2464
10847	2022-06-02 01:04:33	385.718
10848	2022-06-02 01:12:36	393.783
10849	2022-06-02 01:20:40	401.848
10850	2022-06-02 01:28:44	409.911		4.7128	0.4971	0.3177	1	8.48304	3.57912	2.28744
10851	2022-06-02 01:36:48	417.974
10852	2022-06-02 01:44:52	426.037
10853	2022-06-02 01:52:56	434.102
10854	2022-06-02 02:01:00	442.167
10855	2022-06-02 02:09:03	450.233		4.8601	0.4619	0.3328	1	8.74818	3.32568	2.39616
10856	2022-06-02 02:17:08	458.303
10857	2022-06-02 02:25:12	466.367
10858	2022-06-02 02:33:16	474.437
10859	2022-06-02 02:41:20	482.505
10860	2022-06-02 02:49:24	490.572		5.0237	0.4333	0.3471	1	9.04266	3.11976	2.49912
10861	2022-06-02 02:57:28	498.644
10862	2022-06-02 03:05:32	506.715		5.0267	0.4088	0.3334	1	9.04806	2.94336	2.40048
10863	2022-06-02 03:13:36	514.781
10864	2022-06-02 03:21:40	522.848
10865	2022-06-02 03:29:44	530.913
10866	2022-06-02 03:37:48	538.978		5.1144	0.365	0.3408	1	9.20592	2.628	2.45376
10867	2022-06-02 03:45:52	547.043
10868	2022-06-02 03:53:56	555.11
10869	2022-06-02 04:02:00	563.178
10870	2022-06-02 04:10:04	571.244		5.1829	0.343	0.3496	1	9.32922	2.4696	2.51712
